# Supplementary material for: Manipulating upconversion luminescence intensity in a single crystal particle with a waveguide structure
Source: Royal Society of Chemistry journal article supplement (doi:10.1039/d2cp00121g), 2022-01-01
Supplement: d2cp00121g1.pdf [file d2cp00121g1.pdf]

## Manipulating upconversion luminescence intensity in a single crystal particle with waveguide structure

Qingyan Han\*, Bochao Zhao, Wei Gao, Yunxiang Li, Zeyu Sun, Chen Wang, Ye Chen, Yongkai Wang, Xuewen Yan, Jun Dong\*

School of Electronic Engineering, Xi'an University of Posts & Telecommunications,  
Xi'an 710121 China

\*The corresponding author: E-mail: [qyhan@xupt.edu.cn](mailto:qyhan@xupt.edu.cn); [dongjun@xupt.edu.cn](mailto:dongjun@xupt.edu.cn)

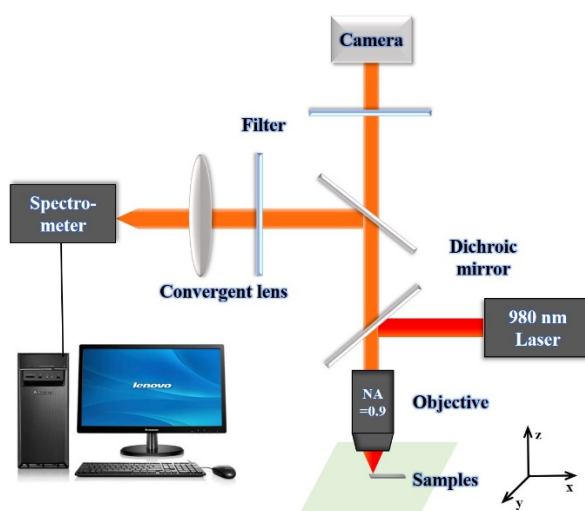

Fig. S1 Schematic setup of the confocal microscopy system for characterization of a single MT.

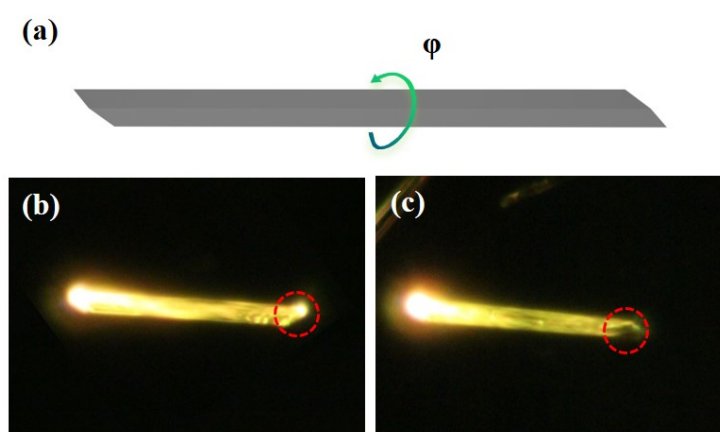

Fig. 1. (a) Schematic of a single  $\beta$ -NaYF<sub>4</sub>: Yb<sup>3+</sup>, Er<sup>3+</sup> MT with the wedge-shaped end plane. (b and c) UCL pattern photographs of the single  $\beta$ -NaYF<sub>4</sub>: Yb<sup>3+</sup>, Er<sup>3+</sup> MT when the rotation angle is 45° and 90°, respectively.
